# Supplementary material for: The ICF2 gene Zbtb24 specifically regulates the differentiation of B1 cells via promoting heme synthesis
Source: PubMed Central journal article supplement (PMC11401330; doi:10.1186/s11658-024-00641-2), 2024-09-14
Supplement: 11658_2024_641_MOESM1_ESM.pdf [file 11658_2024_641_MOESM1_ESM.pdf]

**Table S1. gRNA and primer sequences used in this study.**

| <b>Name</b>              | <b>Sequence (5'→3')</b>                      | <b>Application</b>             |
|--------------------------|----------------------------------------------|--------------------------------|
| <i>Zbtb24</i> -gRNA1     | CCGGAGGGCCGTACAGACTTTTG                      | loxp1 insertion                |
| <i>Zbtb24</i> -gRNA2     | CCAGCCTCACGTAGACACTTTAT                      | loxp2 insertion                |
| <i>Zbtb24</i> -screen F2 | TAACGGACCGGAGGGCGTCTG                        | ES clone selection             |
| <i>Zbtb24</i> -screen R3 | TCAAGTGATAAAGTGTCTACGTGAGGTGCTA              | ES clone selection             |
| <i>Zbtb24</i> -WT Fw     | CCATCTTGTAATATCTTCTGGGTGTCT (in WT allele)   | Genotyping ( <i>Zbtb24</i> )   |
| <i>Zbtb24</i> -WT Rv     | GATAAAGTGTCTACGTGAGGCTGGG (in WT allele)     | Genotyping ( <i>Zbtb24</i> )   |
| <i>Zbtb24</i> -CKO Rv    | GTGTCTACGTGAGGTGCTATAACTTCG (in loxp allele) | Genotyping ( <i>Zbtb24</i> )   |
| <i>Cd19-Cre</i> -M Fw    | GCGGTCTGGCAGTAAAACTATC (in Cre allele)       | Genotyping ( <i>Cd19-Cre</i> ) |
| <i>Cd19-Cre</i> -M Rv    | GTGAAACAGCATTGCTGTCACCTT (in Cre allele)     | Genotyping ( <i>Cd19-Cre</i> ) |
| <i>Cd19-Cre</i> -W Fw    | CCTCTCCCTGTCTCCTTCCT (in WT allele)          | Genotyping ( <i>Cd19-Cre</i> ) |
| <i>Cd19-Cre</i> -W Rv    | TGGTCTGAGACATTGACAATCA (in WT allele)        | Genotyping ( <i>Cd19-Cre</i> ) |
| mZBTB24 Fw               | CCTTGTGGGCAGCTTATGGT                         | RT-qPCR (ZBTB24)               |
| mZBTB24 Rv               | CAAGGCTTTATGGGCTCGGA                         | RT-qPCR (ZBTB24)               |
| mCPOX Fw                 | GAGGAAGCTGACGGTAACACA                        | RT-qPCR (CPOX)                 |
| mCPOX Rv                 | CCCGCGGTGAACTATAAAGA                         | RT-qPCR (CPOX)                 |
| mALAD Fw                 | GCCTCCTGAGTGAAAATGGA                         | RT-qPCR (ALAD)                 |
| mALAD Rv                 | CAGAGACCCTGTTGCCAAGT                         | RT-qPCR (ALAD)                 |
| mGAPDH Fw                | AACTTTGGCATTGTGGAAGG                         | RT-qPCR (GAPDH)                |
| mGAPDH Rv                | GGATGCAGGGATGATGTTCT                         | RT-qPCR (GAPDH)                |

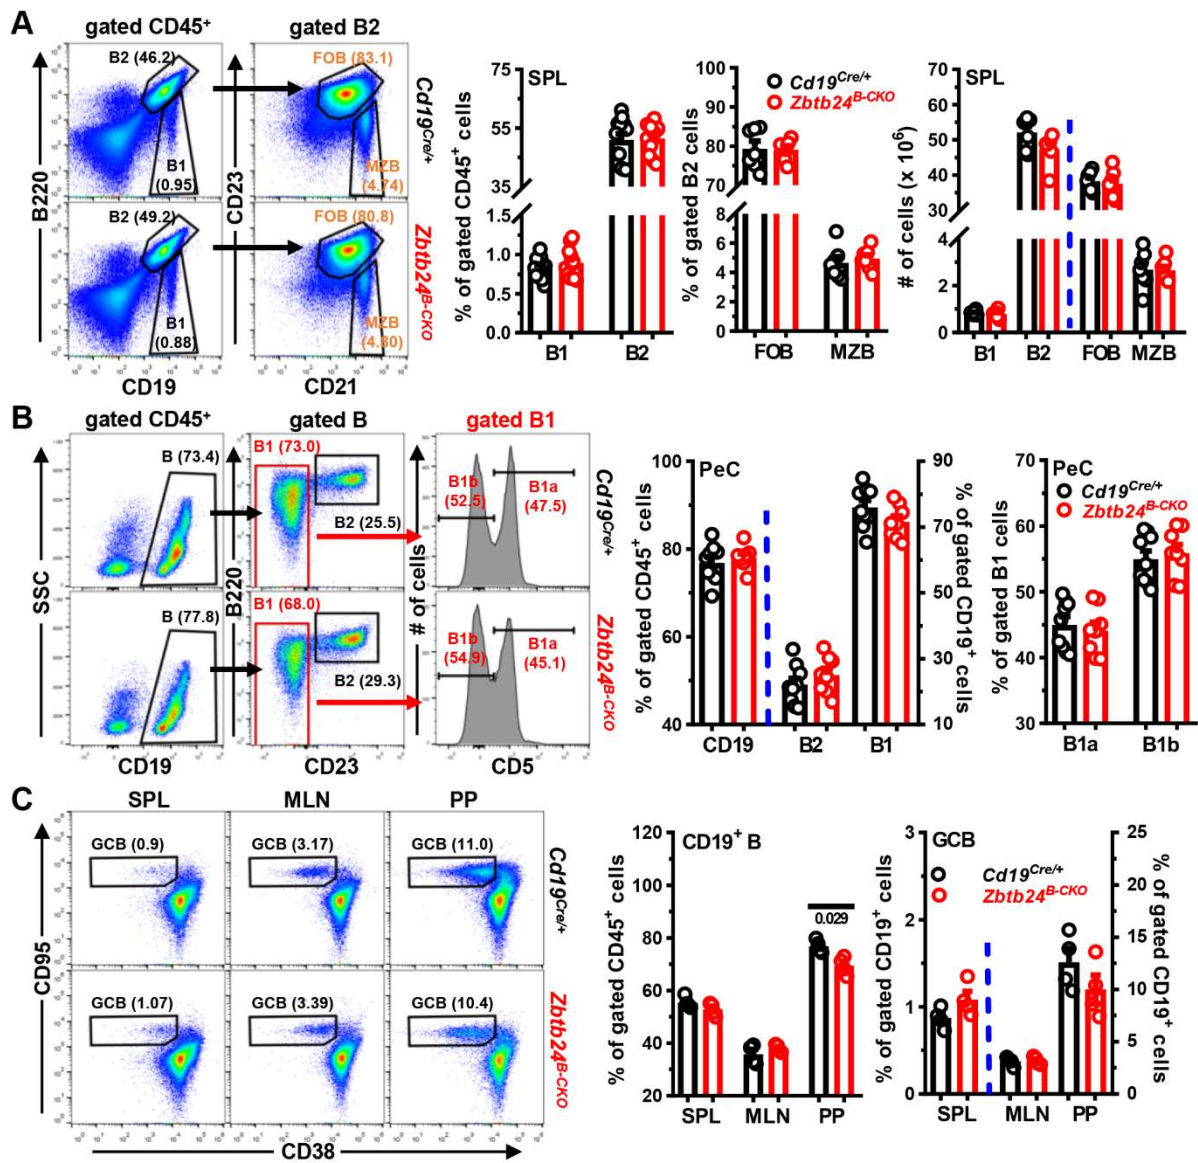

**Figure S1. Little impact of *Zbtb24*-deficiency on the phenotype of B cells in the periphery of mice.** Cells from the spleens (SPL), peritoneal cavities (PeC), mesenteric lymph nodes (MLN) and Peyer's patches (PP) of mice (female, 8-10 weeks old) were stained with antibodies against the indicated surface molecules before flow cytometry analyses. **A&B**, representative pictures/bar graphs showing the gating strategies/percentages of B2 ( $CD19^+B220^{high}$  in SPL or  $CD19^+B220^{high}CD23^+$  in PeC, respectively), B1 ( $CD19^+B220^{low}$  in SPL or  $CD19^+B220^{low}CD23^-$  in PeC, respectively), B1a/b ( $CD5^+/CD5^-$ , respectively, within gated B1), follicular (FOB)/marginal zone (MZB) ( $CD23^{high}CD21^{low}/CD23^{low}CD21^{high}$ , respectively, within gated B2) in the SPL (**A**) or PeC (**B**) of *Cd19<sup>Cre/+</sup>* and *Zbtb24<sup>B-CKO</sup>* mice. The absolute cell numbers are also shown in the far-right panel of **A**. **C**, representative pseudo-plots/bar graphs showing the gating strategies/percentages of germinal center B (GCB,  $CD95^{high}CD38^{low}$ ) within gated  $CD19^+$  B cells in the SPL, MLN and PP of *Cd19<sup>Cre/+</sup>* & *Zbtb24<sup>B-CKO</sup>* mice. Each symbol represents a single mouse of the indicated genotype. The absolute numbers of indicated B-cell subsets did not differ significantly in the PeC, MLN and PP of the two groups of mice (data not shown). AU, arbitrary units. Pooled data from two-independent experiments were shown in **A&B**.

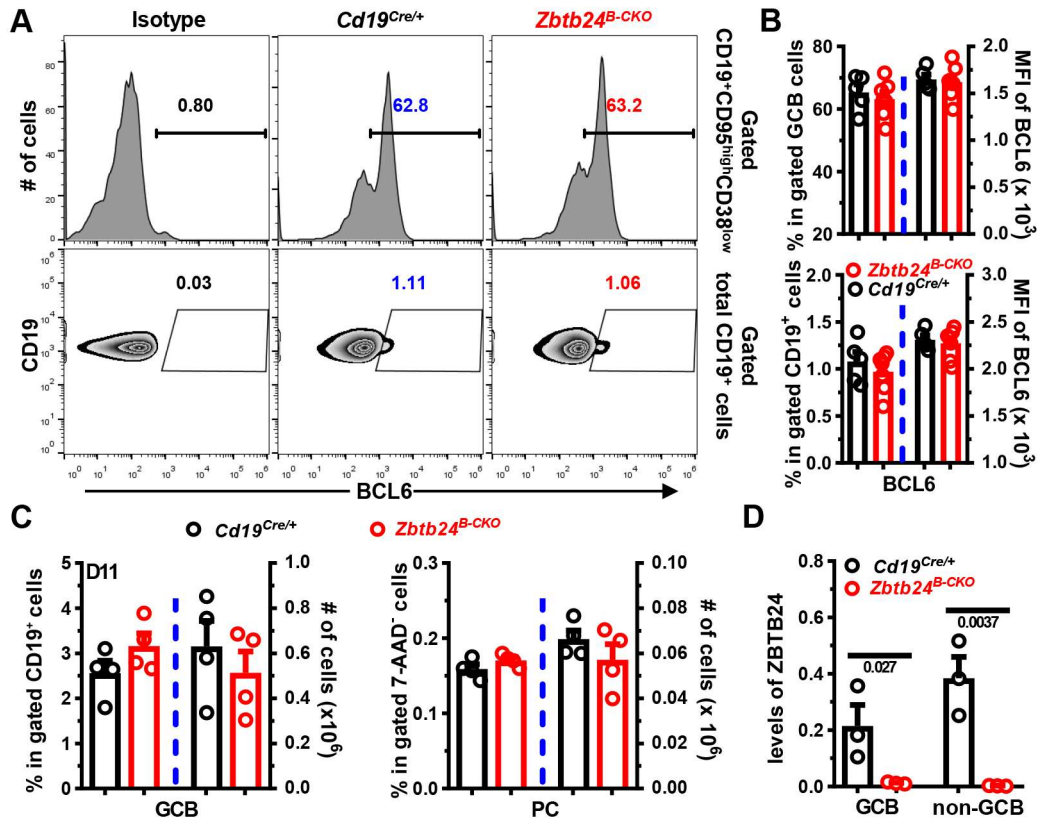

**Figure S2. No effect of *Zbtb24*-deficiency on the phenotype and number of GCB cells after TD-Ag immunization.** Splenic cells in mice were stained with antibodies against CD19/CD95/CD38 & BCL6 (intracellular) or CD19/CD138 plus 7-AAD to visualize the percents/phenotypes of GCB or PC cells in mice depicted in Figure 2A-C on D14 post NP<sub>19</sub>-OVA/IFA immunization (A&B) or on D11 post i.p. immunization with sheep red blood cells (SRBC, 1x10<sup>9</sup> cells/200 μl PBS/mouse, female, 8 weeks of age) (C&D). **A**, representative histograms (upper panel) or zebra-plots (lower panel) showing the percentages of BCL6<sup>+</sup> cells in gated CD19<sup>+</sup>CD95<sup>high</sup>CD38<sup>low</sup> GCB cells (upper panel) or total CD19<sup>+</sup> B cells (lower panel) in control *Cd19<sup>Cre/+</sup>* and *Zbtb24<sup>B-CKO</sup>* mice. **B**, bar graphs showing the percentages of BCL6<sup>+</sup> cells/MFI of BCL6 in gated CD19<sup>+</sup>CD95<sup>high</sup>CD38<sup>low</sup> GCB cells (upper panel) or total CD19<sup>+</sup> B cells (lower panel). **C**, bar graphs showing the percentages/absolute numbers of CD19<sup>+</sup>CD95<sup>high</sup>CD38<sup>low</sup> GCB and CD19<sup>low</sup>CD138<sup>high</sup> PC cells in spleens of mice on D11 post immunization. **D**, mRNA levels of ZBTB24 in FACS-purified CD19<sup>+</sup>CD95<sup>high</sup>CD38<sup>low</sup> GCB and CD19<sup>+</sup>CD95<sup>+</sup>CD38<sup>+</sup> non-GCB cells from spleens of immunized mice. Each symbol represents a single mouse of the indicated genotype, and numbers below horizon lines indicate *P* values determined by student *t*-test.

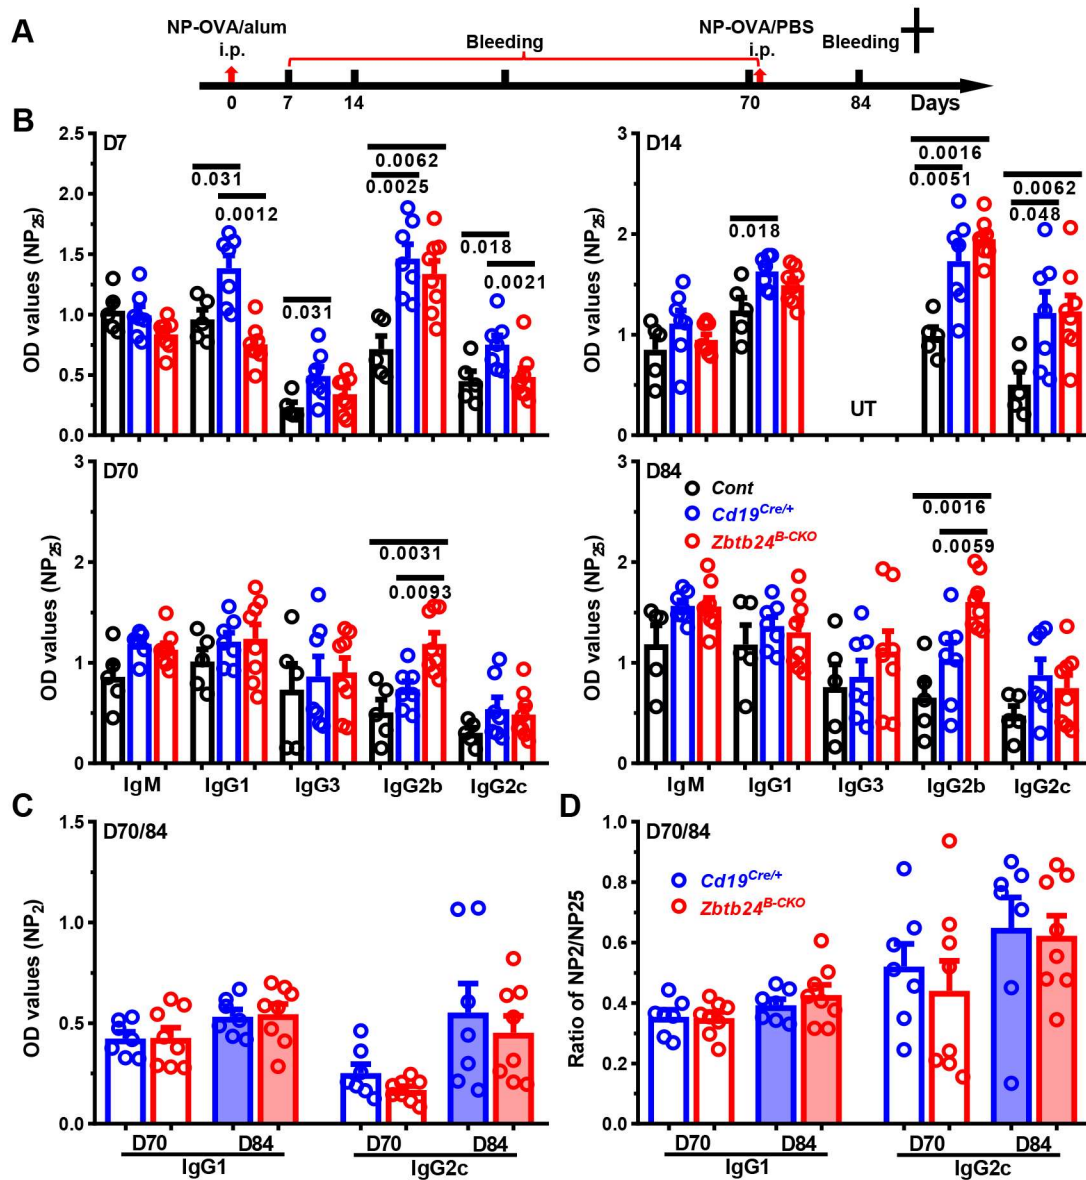

**Figure S3. Deficiency of *Zbtb24* in B cells has no impact on the long-term antibody responses in mice after NP<sub>19</sub>-OVA/alum immunization.** Mice (female, 8 weeks of age) were i.p. immunized with alum-precipitated NP<sub>19</sub>-OVA (NP-OVA/alum, 100  $\mu$ g/100  $\mu$ l/mouse) on D0, and rechallenged with NP<sub>19</sub>-OVA in PBS (50  $\mu$ g/100  $\mu$ l/mouse) on D70. **A**, a schematic diagram depicting the experimental setup. **B&C**, bar graphs showing the optical density (OD) values of NP-specific antibody subtypes against coated NP<sub>25</sub>-BSA (NP<sub>25</sub>, **B**) or NP<sub>2</sub>-BSA (NP<sub>2</sub>, **C**) in diluted sera of *Zbtb24*<sup>loxp/loxp</sup> (*Cont*), *Cd19*<sup>Cre/+</sup> and *Zbtb24*<sup>B-CKO</sup> mice on indicated days. **D**, bar graphs showing the ratios of relatively high-affinity (NP<sub>2</sub>) to low-affinity (NP<sub>25</sub>) NP-specific IgG1 & IgG2c in *Cd19*<sup>Cre/+</sup> and *Zbtb24*<sup>B-CKO</sup> mice on D70 & D84. Each dot represents a single mouse of the indicated genotype and numbers below horizontal lines indicate *P* values determined by Mann-Whitney test. UT, untested.

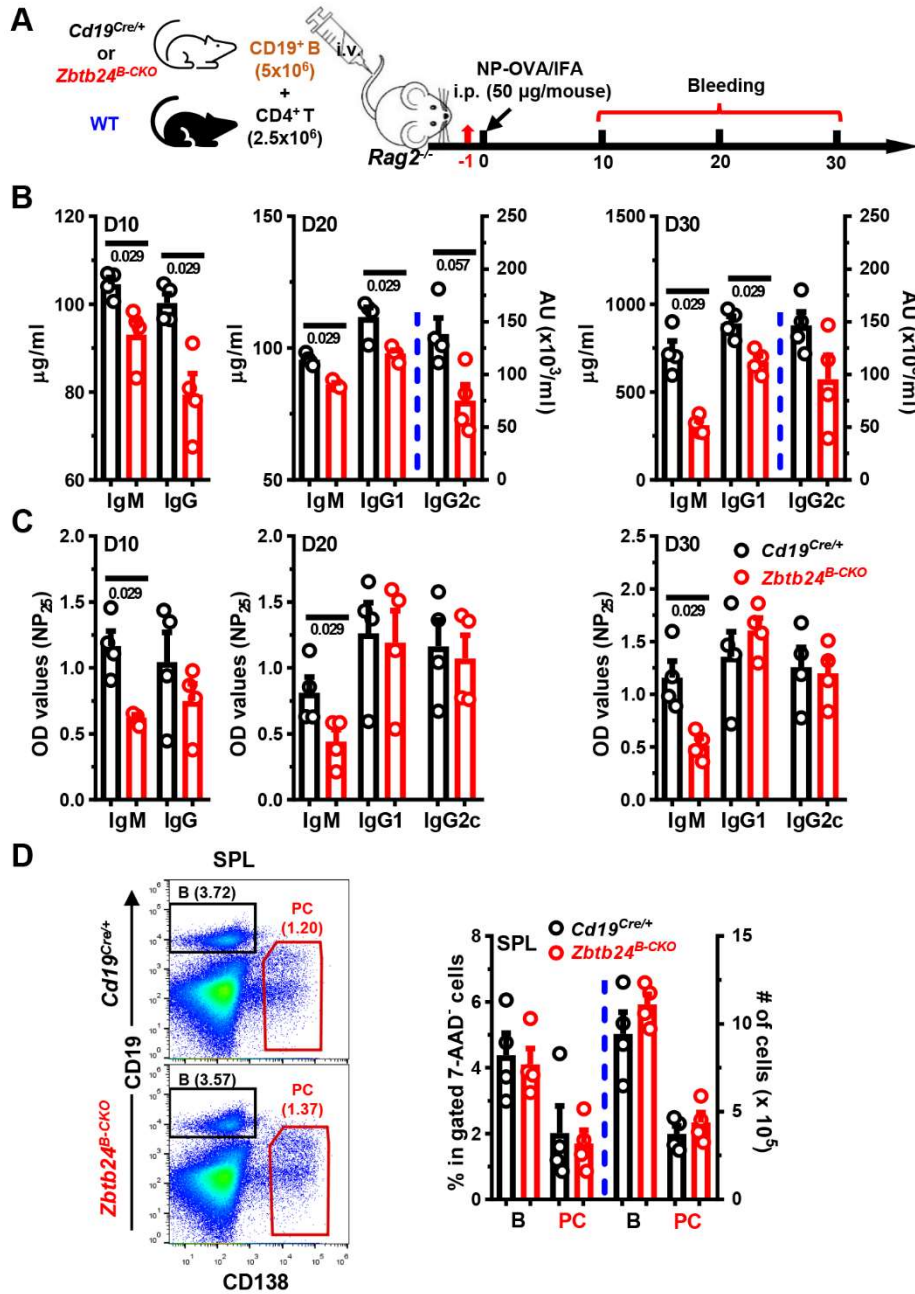

**Figure S4. Reduced total antibody-producing ability of *Zbtb24<sup>B-CKO</sup>* splenic B cells after adoptive transfer.** Total CD19<sup>+</sup> B cells, enriched from *Zbtb24<sup>B-CKO</sup>* or control *Cd19<sup>Cre/+</sup>* mice (male, 8 weeks of age) by magnetic beads, were mixed with CD4<sup>+</sup> T cells (purified from male WT mice) at the ratio of 2:1 before being intravenously (i.v.) injected into the *Rag2<sup>-/-</sup>* recipient mice (5 × 10<sup>6</sup> B cells plus 2.5 × 10<sup>6</sup> T cells per mouse). One day later, recipient mice were immunized with NP<sub>19</sub>-OVA emulsified in IFA (NP-OVA/IFA) intraperitoneally (i.p.). Blood was taken at indicated times, and total or NP-specific antibody levels in sera were determined by ELISA. **A**, a schematic flow-chart of the experiment setup. **B&C**, bar graphs showing levels of total (**B**) or NP-specific (**C**) IgM/IgG or IgG1/IgG2c levels in sera of recipient mice at indicated times. **E**, bar graphs showing the percentages and absolute numbers of CD19<sup>+</sup> B cells or CD19<sup>low</sup>CD138<sup>+</sup> plasma cells (PC) in the spleens (SPL) and bone marrows (BM) of *Cd19<sup>Cre/+</sup>* vs. *Zbtb24<sup>B-CKO</sup>* mice. Representative pseudo-plots showing the gates for each population were shown in **D**. Each dot represents a single recipient mouse, and numbers below horizontal lines indicate *P* values. AU, arbitrary units.

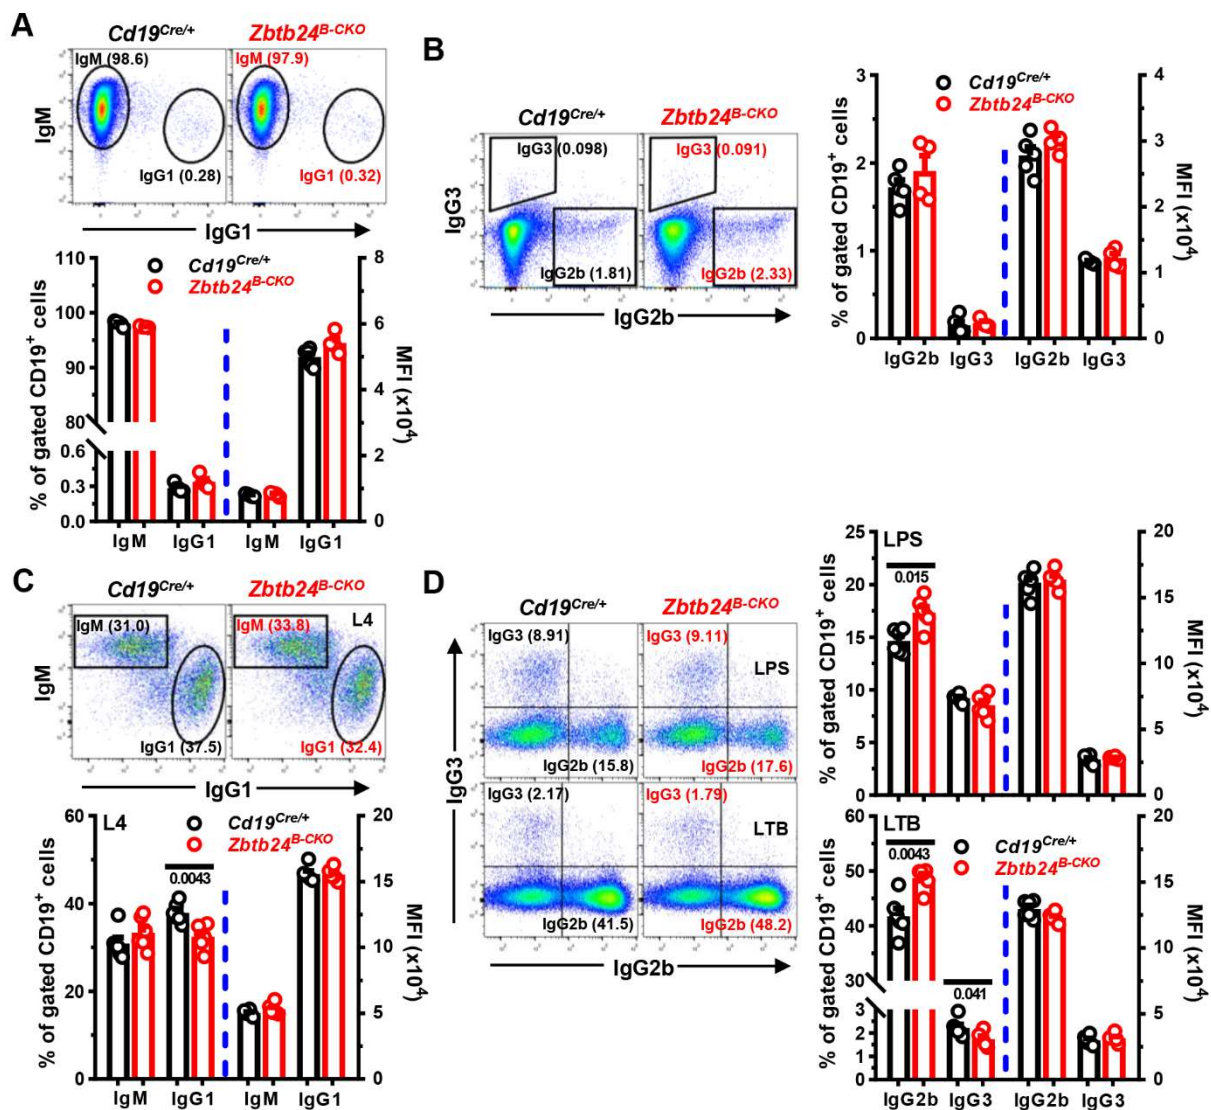

**Figure S5. Grossly intact CSR ability of *Zbtb24<sup>B-CKO</sup>* B cells.** Splenic B cells ( $2 \times 10^5$  cells/well) from *Cd19<sup>Cre/+</sup>* or *Zbtb24<sup>B-CKO</sup>* mice were stimulated with LPS (10  $\mu\text{g/ml}$ ) in the absence/presence of IL-4 (25 ng/ml) or TGF- $\beta$  (1 ng/ml) plus BAFF (10 ng/ml) in 96 U-bottom plates. On day 4, cells were collected and expressions of surface IgM/IgG2b/IgG3 & IgG1 were analyzed by flow cytometry. **A&C**, representative pseudo-plots and bar graphs showing the surface IgM/IgG1 on B cells before (A) and after culture with LPS plus IL-4 (L4, C). **B&D**, representative pseudo-plots/bar graphs showing the surface IgG2b/IgG3 on B cells before (B) and after culture with LPS without (*upper panel* in D)/with TGF- $\beta$  & BAFF (LTB, *lower panel* in D). Each symbol represents a single mouse of the indicated genotype (female, 10 weeks of age), and numbers below horizontal lines indicate *P* values. MFI, mean fluorescence intensity.

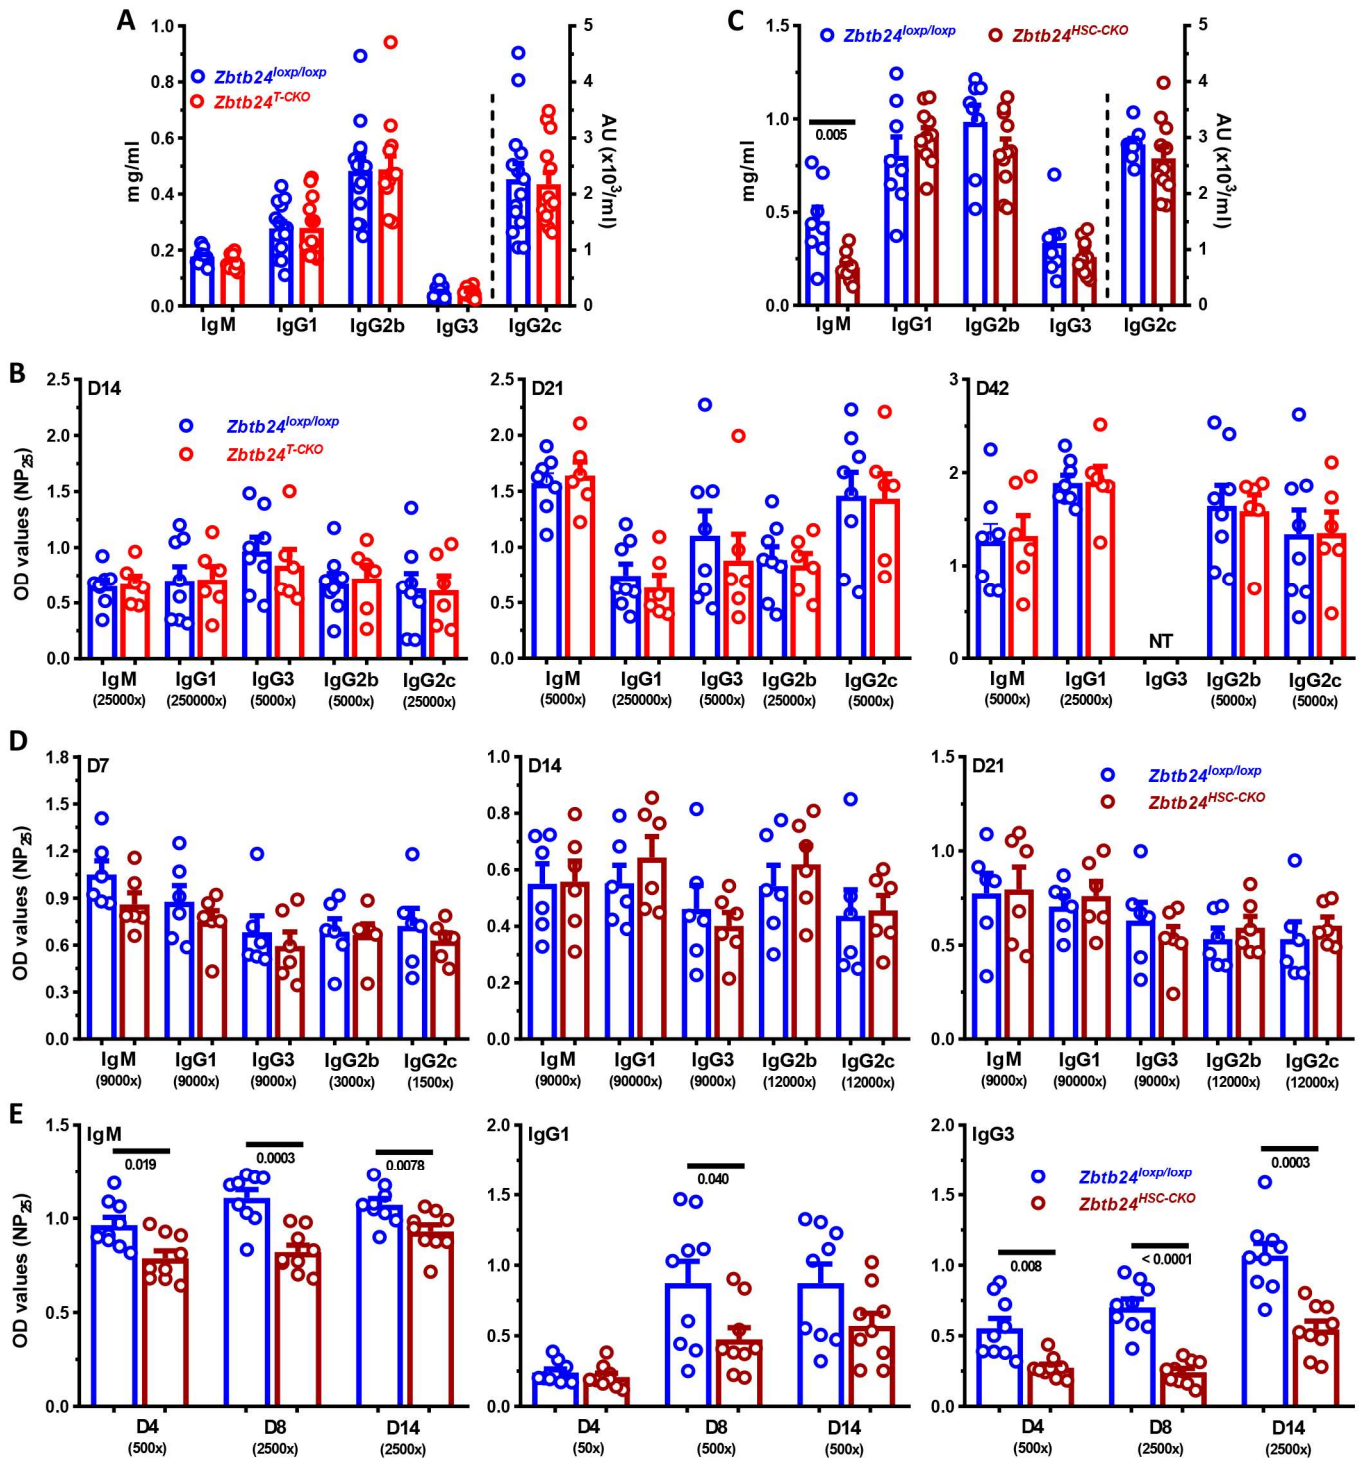

**Figure S6. Little effect of *Zbtb24*-deficiency in hematopoietic cells on humoral responses against TD-Ags in mice.** **A&C**, bar graphs showing levels of total IgM, IgG1, IgG2b, IgG2c and IgG3 in sera of naive *Zbtb24<sup>loxp/loxp</sup>* vs. *Zbtb24<sup>T-CKO</sup>* (*Cd4<sup>Cre/+</sup>Zbtb24<sup>loxp/loxp</sup>*) mice (**A**, female, 10-12 weeks old) or naive *Zbtb24<sup>loxp/loxp</sup>* vs. *Zbtb24<sup>HSC-CKO</sup>* (*Vav1<sup>Cre/+</sup>Zbtb24<sup>loxp/loxp</sup>*) mice (**C**, male, 8-10 weeks old). Deletion of *Zbtb24* in the hematopoietic system does not significantly impact the phenotypes and numbers of T and B cells in the peripheral lymph organs of mice (data not shown). **B, D&E**, bar graphs showing the optical density (OD) values of NP-specific antibody subtypes against coated NP<sub>25</sub>-BSA (NP<sub>25</sub>) in diluted sera of *Zbtb24<sup>loxp/loxp</sup>* vs. *Zbtb24<sup>T-CKO</sup>* (**B**, male, 8-10 weeks old) or *Zbtb24<sup>loxp/loxp</sup>* vs. *Zbtb24<sup>HSC-CKO</sup>* mice (**D&E**) on indicated days after i.p. immunizations with NP<sub>19</sub>-OVA emulsified in IFA (**B**, 1:1, 30  $\mu\text{g}/100 \mu\text{l}$  mouse), alum-precipitated NP<sub>25</sub>-CGG (**D**, 25  $\mu\text{g}/100 \mu\text{l}/\text{mouse}$ , 8-10 weeks old males) or NP-Ficoll (**E**, 10  $\mu\text{g}/100 \mu\text{l}/\text{mouse}$ , 8-week old males) on D0. Each dot represents a single mouse of the indicated genotype. Data were pooled from two independent experiments. Numbers below horizontal lines indicate *P* values determined by Mann-Whitney test, and numbers in brackets below the X-axis denote the dilution factor for each antibody subtype. NT, not tested.

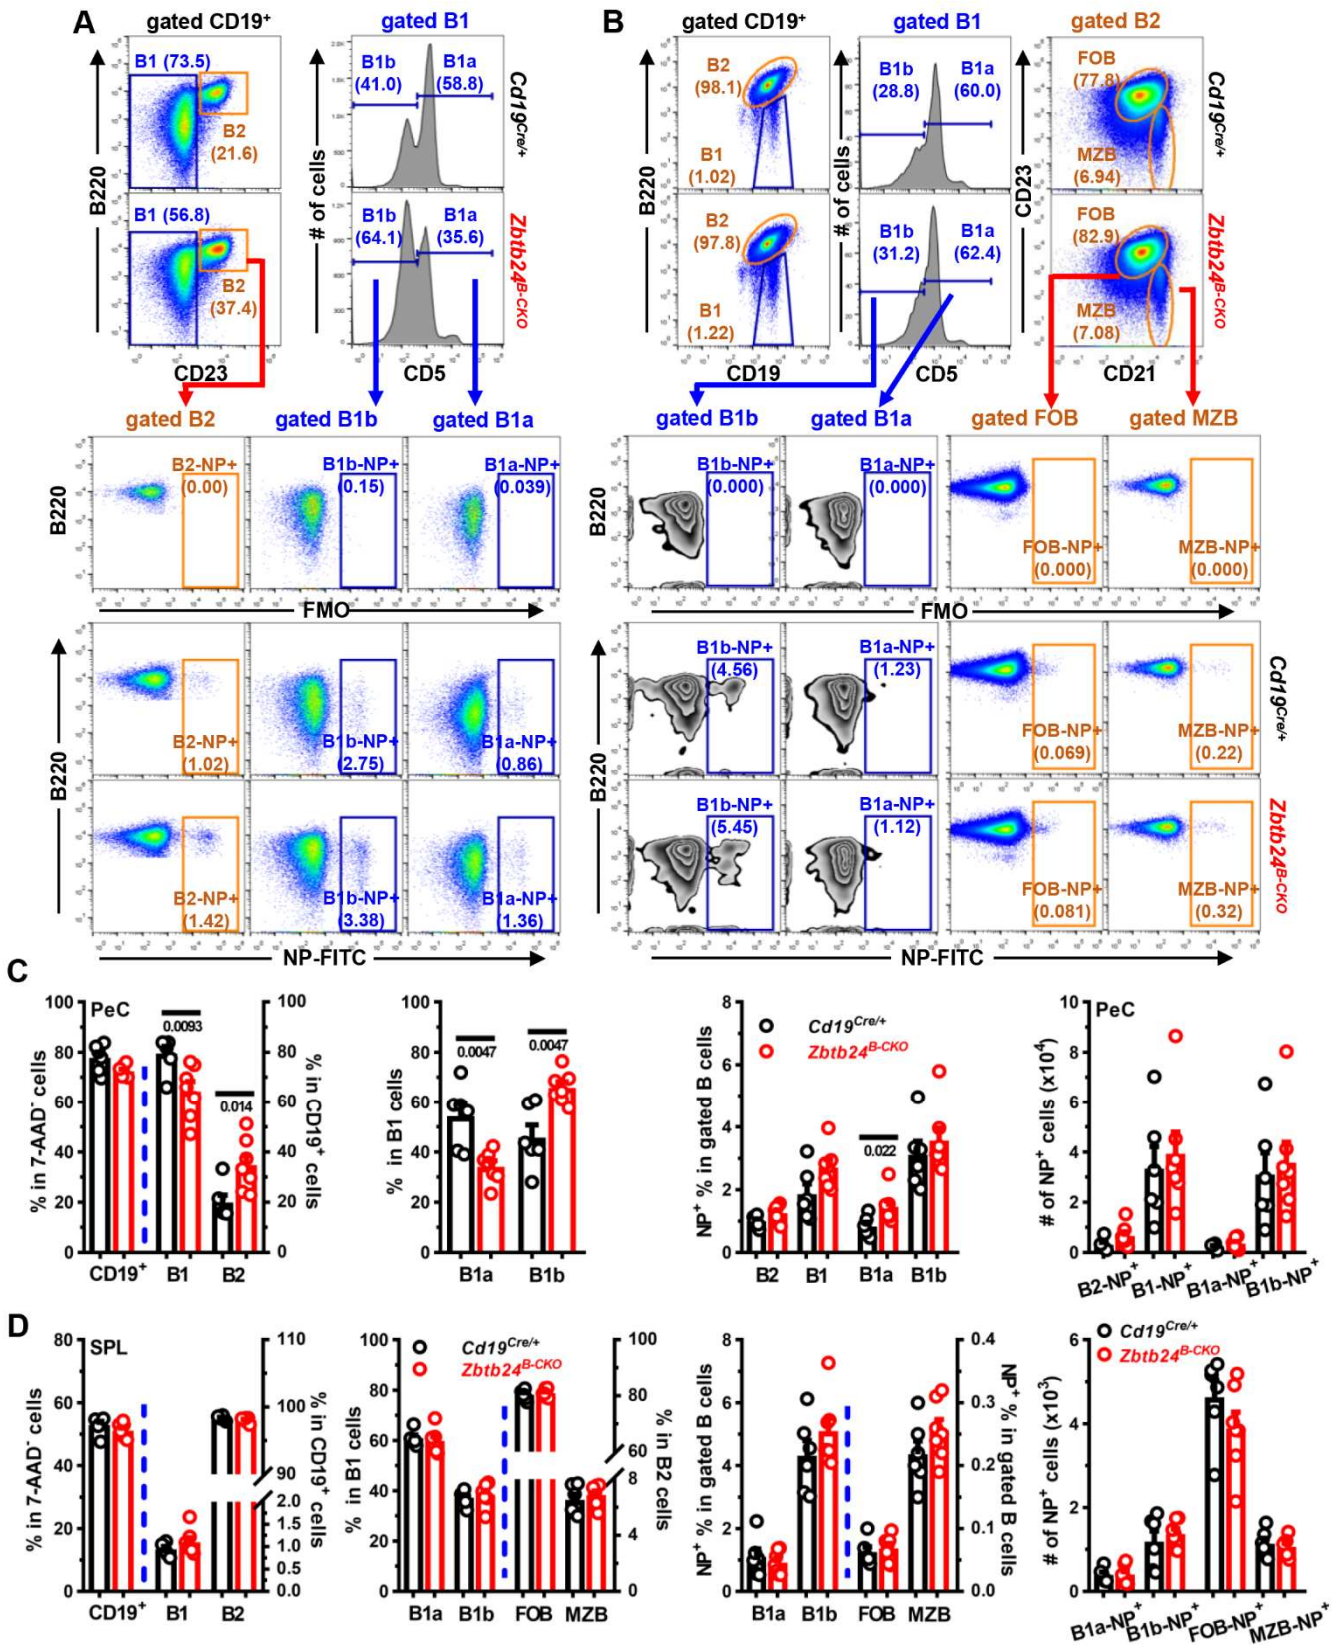

**Figure S7. Comparable numbers of NP<sup>+</sup> B cells in *Cd19<sup>Cre/+</sup>* & *Zbtb24<sup>B-CKO</sup>* mice on D35 after NP-Ficoll immunization.** Peritoneal and splenic cells in NP-Ficoll immunized mice (depicted in Figure 3A-E) were stained with antibodies against B220/CD19/CD5/CD21/CD23 in combination with 7-AAD and NP-FITC. **A&B**, representative flow cytometry plots showing the gating strategies to identify NP<sup>+</sup> cells within gated B2/B1, B1a/B1b & follicular (FOB)/marginal zone (MZB) B cells in peritoneal cavities (**A**) and spleens (**B**). Gates for NP<sup>+</sup> cells within B2 (B2-NP<sup>+</sup>), B1b (B1b-NP<sup>+</sup>), B1a (B1a-NP<sup>+</sup>), FOB (FOB-NP<sup>+</sup>) & MZB (MZB-NP<sup>+</sup>) were set based on the FMO (fluorescence minus one/FITC-channel) samples. **C&D**, bar graphs showing the percentages/absolute numbers of NP<sup>+</sup> cells within indicated B-cell subsets in peritoneal cavities (PeC, **C**) and spleens (SPL, **D**) of *Cd19<sup>Cre/+</sup>* & *Zbtb24<sup>B-CKO</sup>* mice. Each dot represents a single mouse of the indicated genotype, and numbers below horizontal lines indicate *P* values.



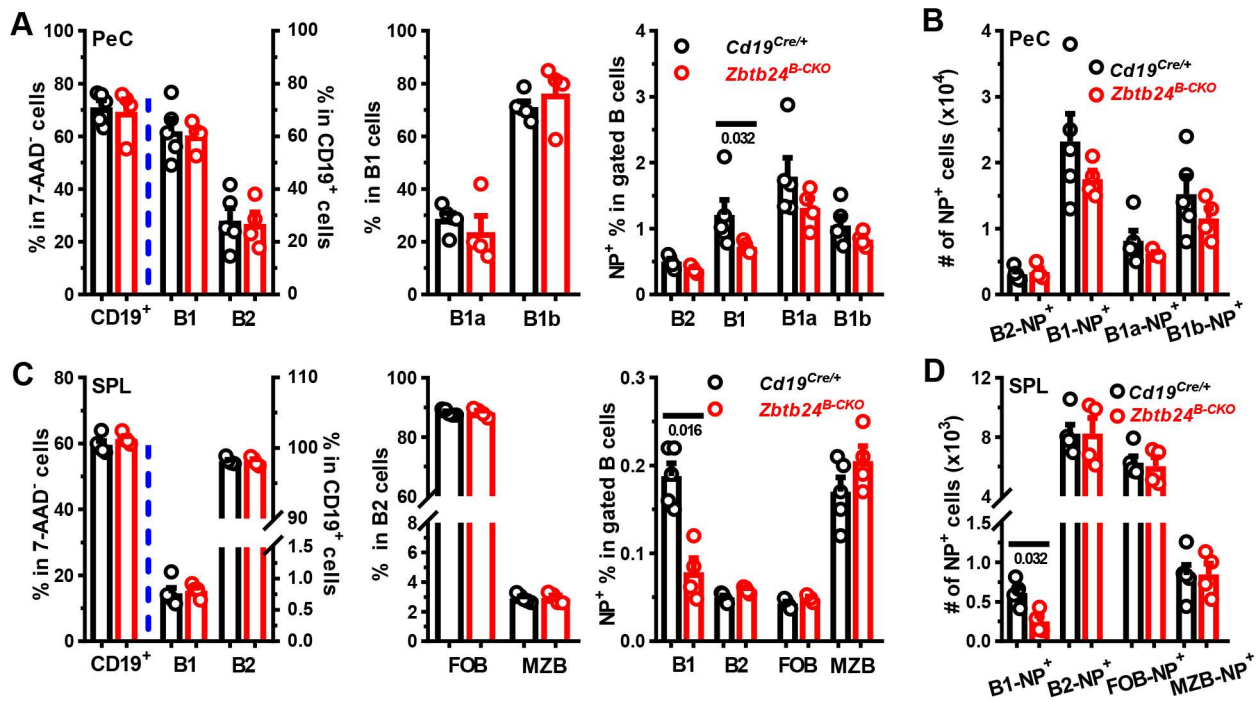

**Figure S8. Reduced numbers of NP<sup>+</sup> B1 cells in *Zbtb24<sup>B-CKO</sup>* mice after NP-LPS immunization.** Peritoneal and splenic cells in NP-LPS immunized mice (depicted in Figure 3F-H) were stained and analyzed as described in Figure S7A&B. **A&B**, bar graphs showing the percentages (**A**) and absolute numbers (**B**) of NP<sup>+</sup> cells within indicated B-cell subsets in peritoneal cavities (PeC) of mice. **C&D**, bar graphs showing the percentages (**C**) and absolute numbers (**D**) of NP<sup>+</sup> cells within indicated B-cell compartments in spleens (SPL) of *Cd19<sup>Cre/+</sup>* vs. *Zbtb24<sup>B-CKO</sup>* mice. Each dot represents a single mouse of the indicated genotype, and numbers below horizontal lines indicate *P* values.

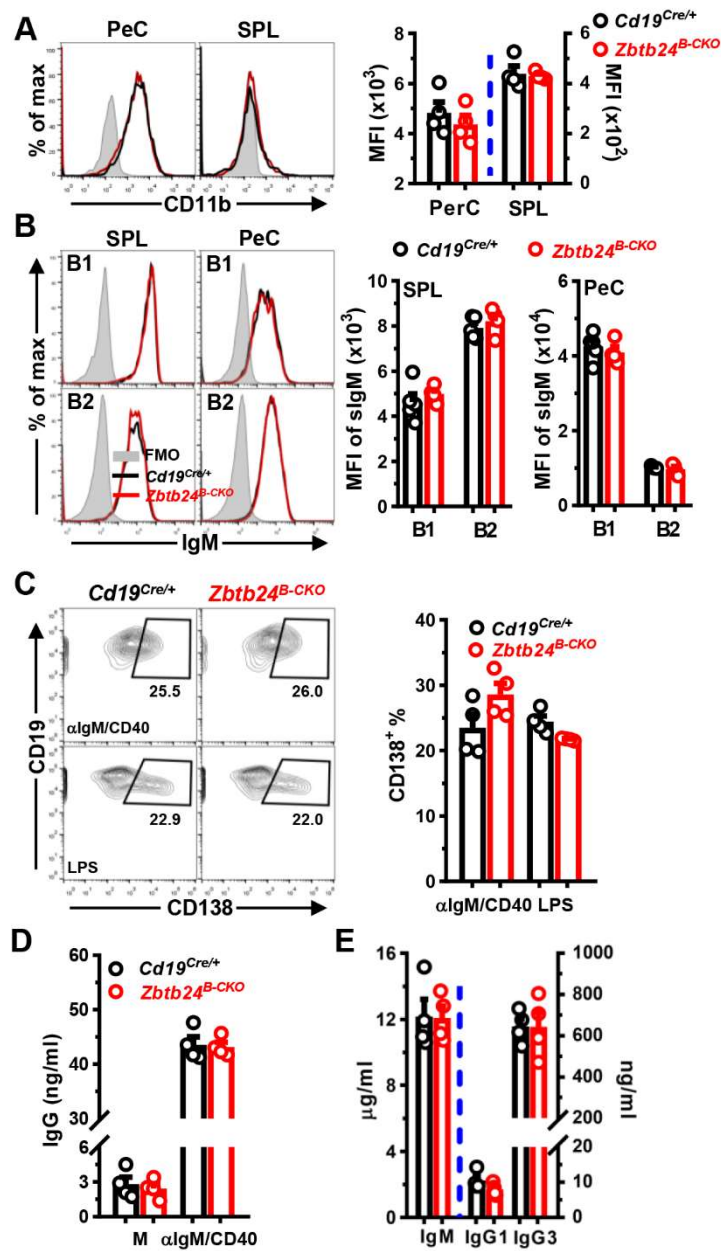

**Figure S9. *Zbtb24*-deficiency has no impact on the differentiation and antibody-producing ability of splenic B cells *in vitro*.** **A&B**, representative overlaid-histograms & bar graphs showing levels of surface CD11b (**A**) or IgM (sIgM, **B**) on splenic (SPL)/peritoneal (PeC) B1/B2 cells in  $Cd19^{Cre/+}$  vs.  $Zbtb24^{B-CKO}$  mice. Splenic and peritoneal cells were stained with antibodies against CD19/B220/CD23 & CD11b/IgM before flow cytometry analyses. **C**, representative contour-plots & bar graphs showing percentages of CD138<sup>+</sup> PC cells in cultured splenic CD19<sup>+</sup> B cells. **D&E**, levels of IgG (**D**) or IgM/IgG1/IgG3 (**E**) in supernatants of splenic B cells cultured in M, αIgM/CD40 (**D**) or LPS (**E**). CD19<sup>+</sup> B cells were FACS-sorted from spleens of  $Cd19^{Cre/+}$  &  $Zbtb24^{B-CKO}$  mice, and subsequently cultured ( $1 \times 10^5$  cells/well in 96-well plate) in medium (M), anti-IgM & anti-CD40 (αIgM/CD40, 5/5 μg/ml) or LPS (10 μg/ml). On day 4, surface expressions of CD138 on cultured B cells were analyzed by flow cytometry, and antibody levels in culture supernatants were determined by ELISA (**C-E**). Each symbol represents a single mouse of the indicated genotype (female, 8-10 weeks of age).

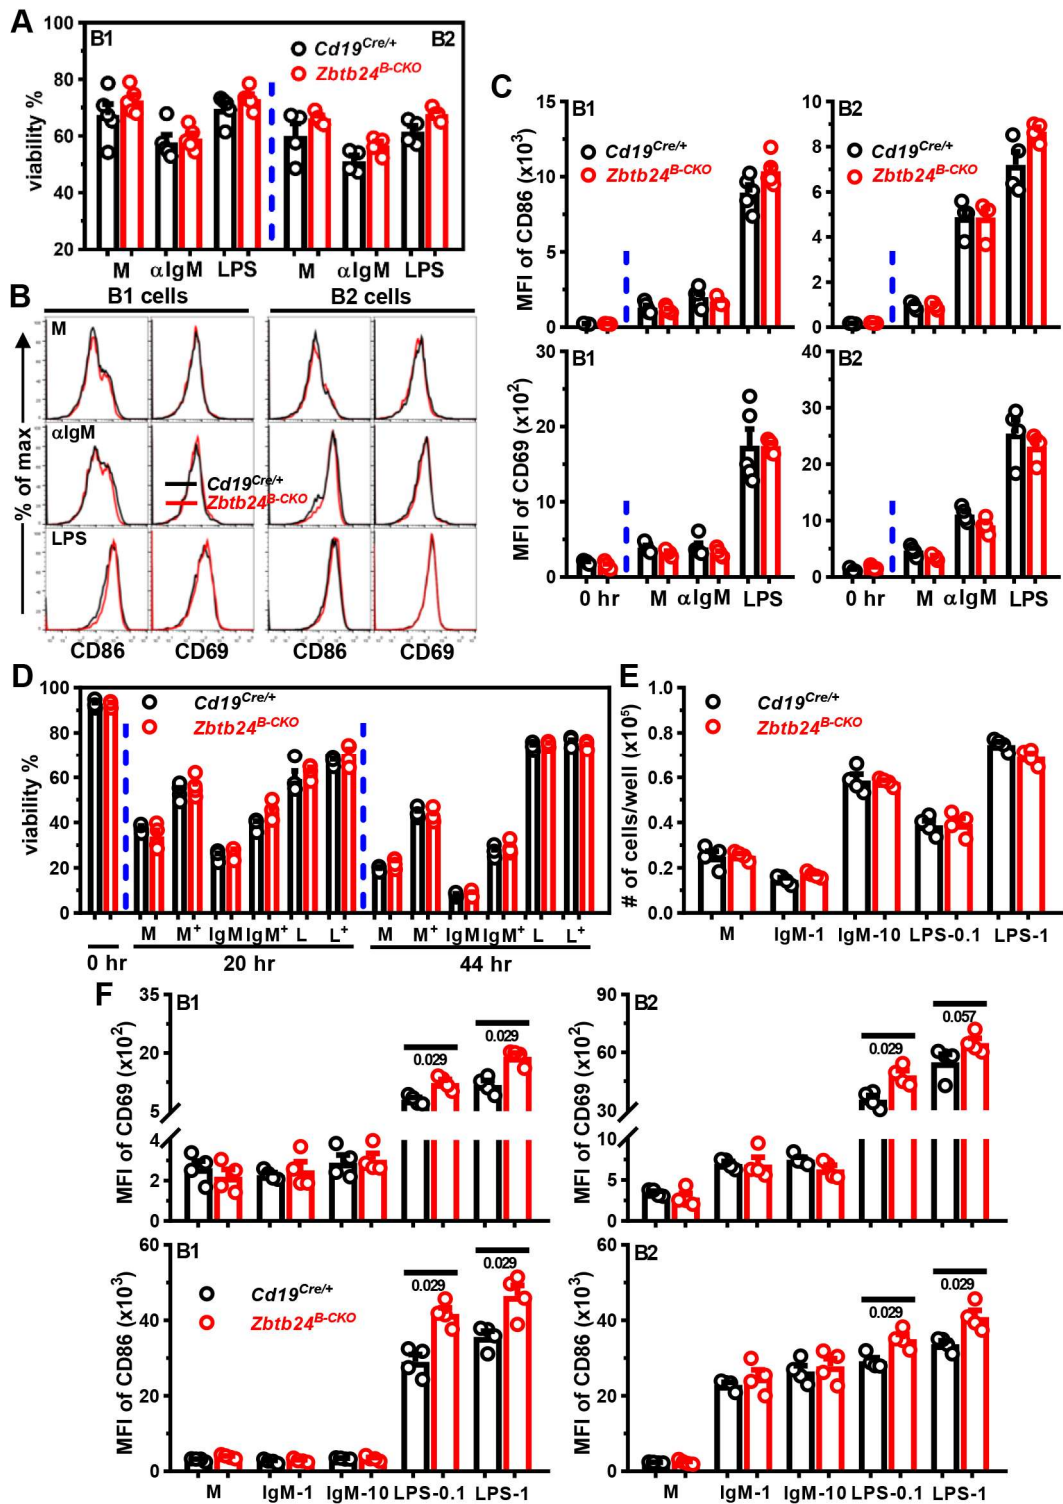

**Figure S10. *Zbtb24*-deficiency does not compromise the survival, activation and proliferation of *Zbtb24*<sup>B-CKO</sup> B cells *in vitro*.** CD19<sup>+</sup>B220<sup>low</sup>CD23<sup>-</sup> B1 and CD19<sup>+</sup>B220<sup>high</sup>CD23<sup>+</sup> B2 cells were FACS-sorted from peritoneal cavities of *Cd19*<sup>Cre/+</sup> & *Zbtb24*<sup>B-CKO</sup> mice, and subsequently cultured (2-5 × 10<sup>4</sup> cells/well in 96-U bottom plate) in medium (M), αIgM (2 μg/ml) or LPS (0.5 μg/ml). Viabilities (based on forward/side scatter) and surface levels of CD69/CD86 were analyzed by flow cytometry (A-C). **A**, bar graphs showing viabilities of peritoneal B1 & B2 cells at 24 hrs. **B&C**, representative overlaid histograms (**B**) or bar graphs (**C**) showing surface expressions of CD86 & CD69 on 24-hr cultured peritoneal B1/B2 cells derived from *Cd19*<sup>Cre/+</sup> vs. *Zbtb24*<sup>B-CKO</sup> mice before (0 hr) and after 24 hr's culture. CD19<sup>+</sup> B cells were purified from spleens of *Cd19*<sup>Cre/+</sup> & *Zbtb24*<sup>B-CKO</sup> mice, and subsequently cultured (1.5-2 × 10<sup>5</sup> cells/well in 96-well plate) in medium, anti-IgM or LPS before flow cytometry analysis (**D-F**). **D**, bar graphs showing the percents of living cells (7-AAD<sup>-</sup> & Annexin V<sup>-</sup>) before (0 hr) or after cultures in M, 1 μg/ml anti-IgM (IgM) or LPS (L) in the absence/presence of 0.2 μg/ml BAFF (indicated by a '+' in the upper-right corner) for 20 & 44 hrs. **E**, bar graphs showing the numbers of living cells (based on forward/side scatter) in different cultures on day 3. **F**, bar graphs showing the expression levels of surface CD69 (top row) and CD86 (bottom row) on gated B2 (CD19<sup>+</sup>B220<sup>high</sup>, left column) or B1 (CD19<sup>+</sup>B220<sup>low</sup>, right column) cells after 20 hrs' culture in medium (M), 1/10

μg/ml anti-IgM (IgM-1/IgM-10, respectively), 0.1/1 μg/ml LPS (LPS-0.1/LPS-1, respectively). Each symbol represents a single mouse of the indicated genotype (12-week-old males in A-C, and 8-week-old females in D-F), and numbers below horizontal lines in F indicate *P* values.

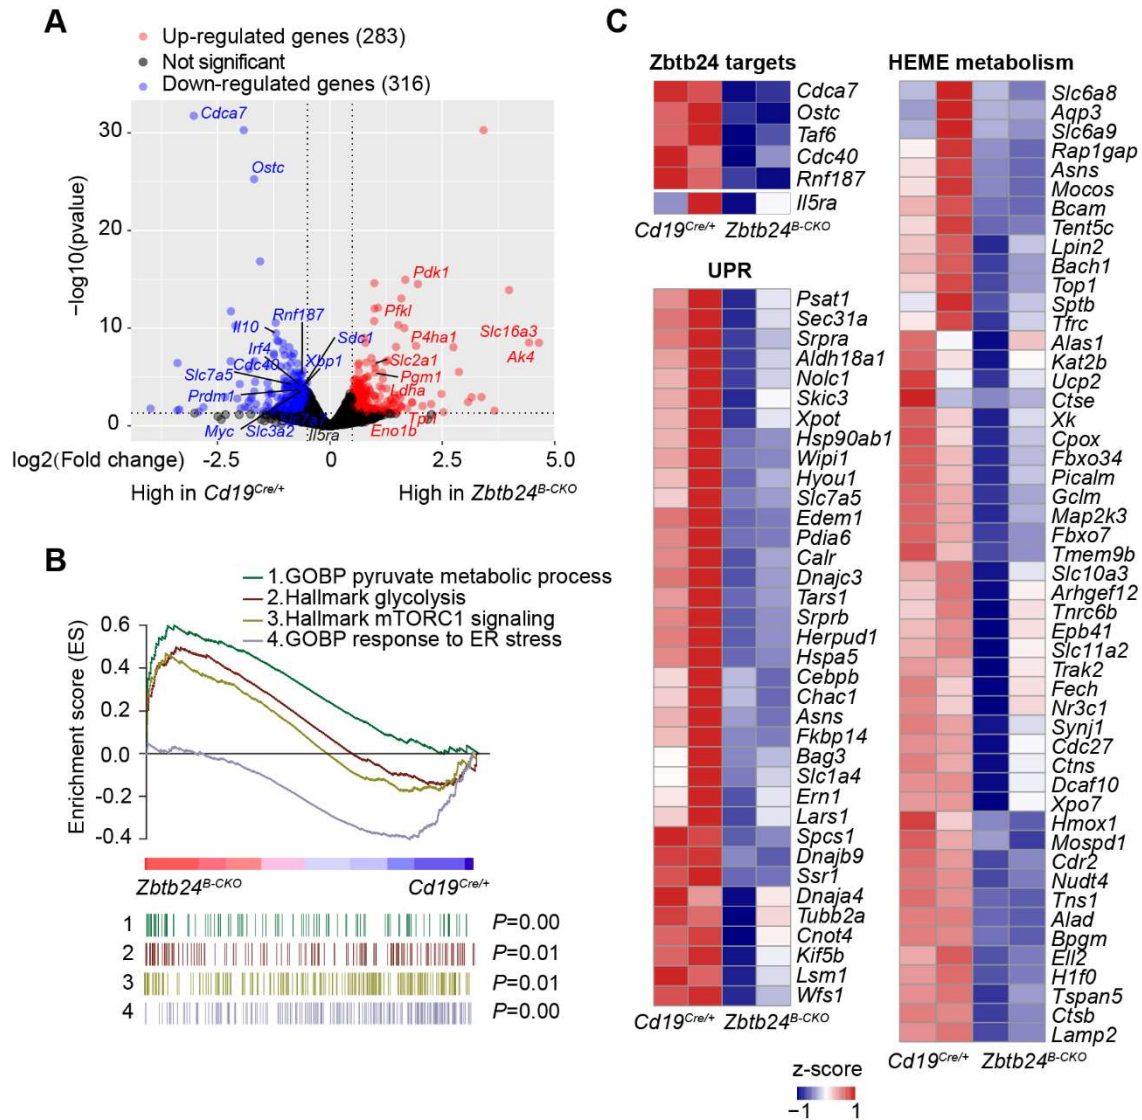

**Figure S11. Dysregulated genes/signaling pathways in *Zbtb24*-deficient B1 cells.** FACS-sorted peritoneal CD19<sup>+</sup>B220<sup>low</sup>CD23<sup>-</sup> B1 cells were stimulated with 0.1 μg/ml LPS in 96-U bottom plate for 24 hrs (related to Figure 6A-C). **A**, volcano plots showing upregulated (red) or downregulated (blue) genes in *Zbtb24*<sup>B-CKO</sup> B1 cells. **B**, GSEA plots showing the enrichment of genes regulating pyruvate metabolism, glycolysis, mTORC1 signaling and ER stress in LPS-stimulated *Zbtb24*<sup>B-CKO</sup> vs. *Cd19*<sup>Cre/+</sup> B1 cells. **C**, heatmaps showing the z-score normalized on the raw expression counts of reported ZBTB24 target genes or those affiliated to UPR and heme metabolism in *Zbtb24*-deficient B1 cells by GSEA.

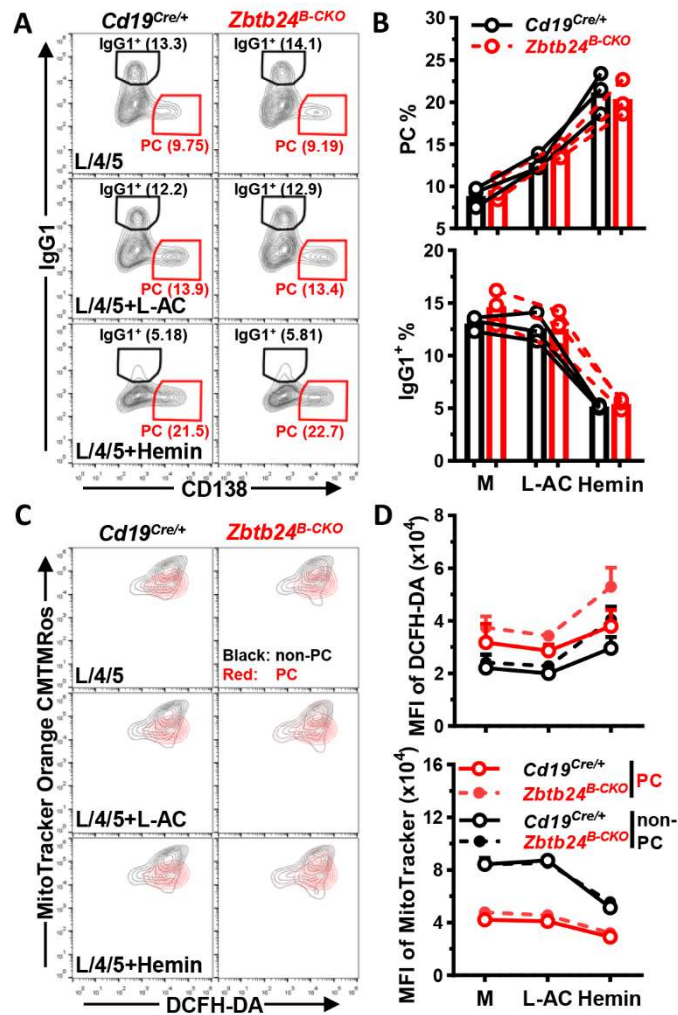

**Figure S12. No effect of *Zbtb24*-deficiency on heme metabolism in stimulated splenic B cells.** Splenic B cells, isolated from *Cd19<sup>Cre/+</sup>* or *Zbtb24<sup>B-CKO</sup>* mice, were stimulated with 10  $\mu$ g/ml LPS plus 10 ng/ml IL-4 & IL-5 (L/4/5) without/with additional L-AC (250  $\mu$ M) or Hemin (25  $\mu$ M) in 96-U bottom plate for 4 days. **A&B**, representative contour-plots (**A**) and bar graphs (**B**) showing the percentages of class-switched CD138-IgG1<sup>+</sup> B cells (IgG1<sup>+</sup>) or differentiated IgG1<sup>-</sup>CD138<sup>+</sup> PC in stimulated *Cd19<sup>Cre/+</sup>* vs. *Zbtb24<sup>B-CKO</sup>* splenic B cells on day 4. **C**, representative overlaid contour-plots showing the intracellular ROS levels (visualized by DCFH-DA) and mitochondrial mass/membrane potentials (detected by MitoTracker Orange CMTMRos) in gated CD138<sup>-</sup> non-PC (black) vs. CD138<sup>+</sup> PC (red) in cultured splenic B cells on day 4. **D**, line graphs showing the ROS levels (MFI of DCFH-DA, upper panel) and mitochondrial mass/membrane potential (MFI of MitoTracker, lower panel) in gated non-PC/PC cells in *Cd19<sup>Cre/+</sup>* vs. *Zbtb24<sup>B-CKO</sup>* splenic B cell cultures. Each dot in **B** represents a single mouse of the indicated genotype (male, 14 weeks of age), while results in **D** are expressed as mean  $\pm$  SEM (n=3).

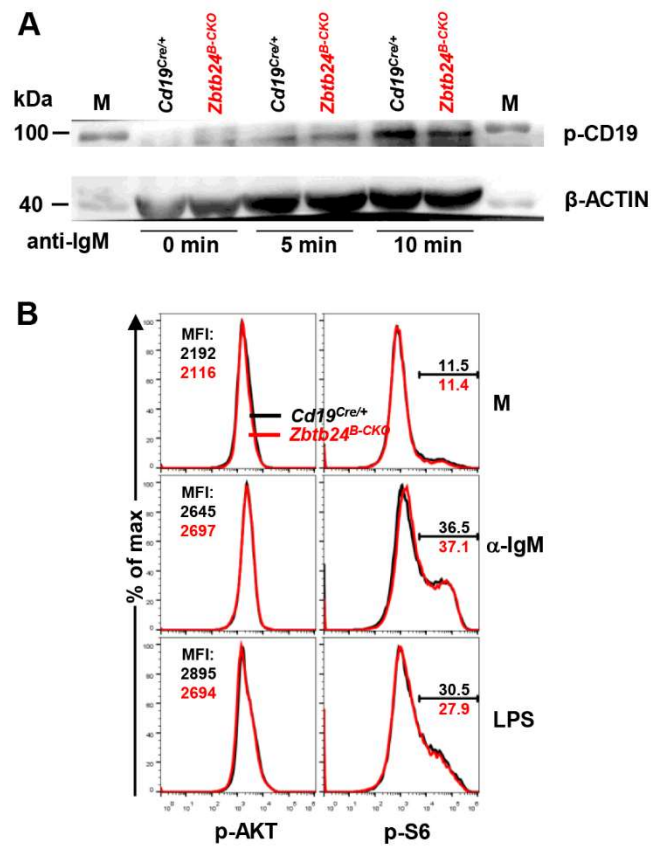

**Figure S13. Little impact of *Zbtb24*-depletion on the phosphorylation of CD19, AKT and ribosomal protein S6 (S6) in B cells.** Beads-enriched CD19<sup>+</sup> B cells were activated with anti-IgM (10 μg/ml) for 0/5/10 mins (**A**), or stimulated with medium (M), anti-IgM (10 μg/ml) or LPS (1 μg/ml) for 30 hrs (**B**) *in vitro* before analysis. **A**, levels of phosphorylated CD19 (p-CD19) were detected by WB. M in the far left/right lane denotes marker. **B**, Levels of phosphorylated AKT (p-AKT) and S6 (p-S6, an event controlled by mTORC1 activity) were analyzed by flow cytometry. Experiments were performed twice with similar results.
