# Supplementary material for: The ICF2 gene Zbtb24 specifically regulates the differentiation of B1 cells via promoting heme synthesis
Source: PubMed Central journal article supplement (PMC11401330; doi:10.1186/s11658-024-00641-2), 2024-09-14

Uncropped picture  
of Figure 1D (CD19<sup>+</sup> B cells )

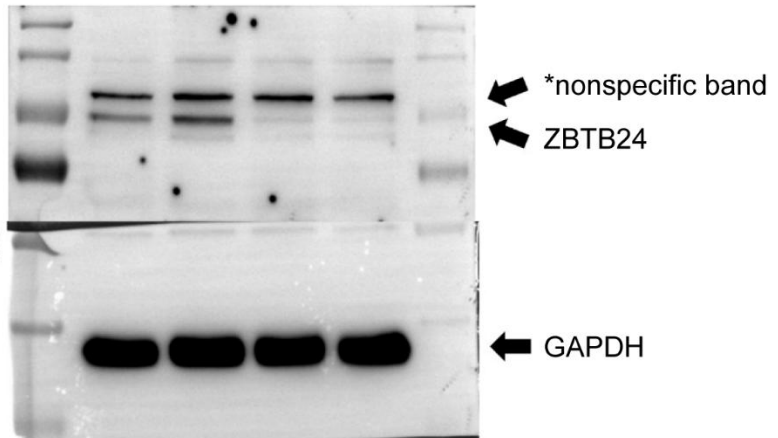

Uncropped picture  
of Figure 1D (CD19<sup>-</sup> B cells )

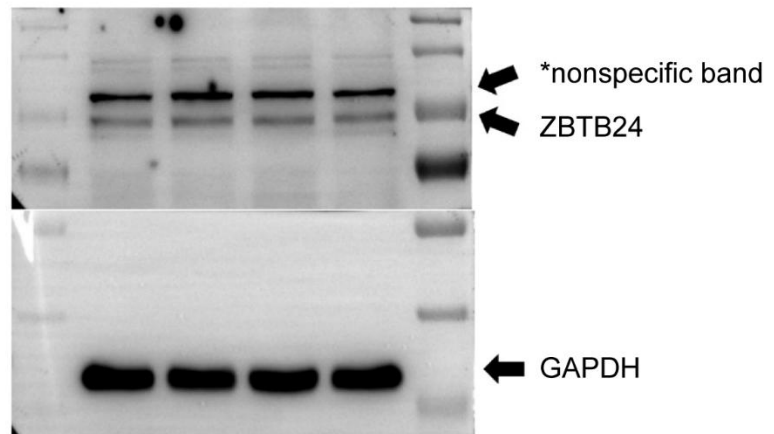

Uncropped picture  
Of Figure S13A

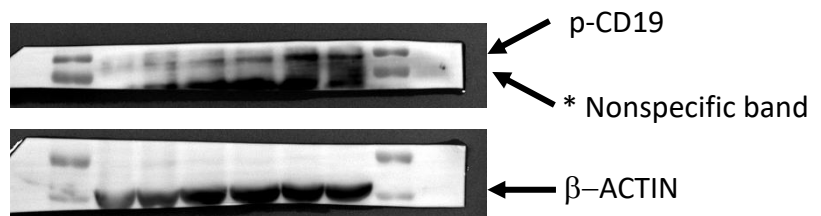

Supplement: 11658_2024_641_MOESM3_ESM.pdf [file 11658_2024_641_MOESM3_ESM.pdf]
